# Supplementary material for: Aedes albopictus and Its Environmental Limits in Europe
Source: PLoS One. 2016 Sep 7;11(9):e0162116. doi: 10.1371/journal.pone.0162116 (PMC5014377; doi:10.1371/journal.pone.0162116)
Supplement: S1 Dataset — The records were adjusted to the raster of the environmental variables with a spatial resolution of 5 arc minutes. (CSV) [file pone.0162116.s001.csv]

species	lon	lat
Aedes albopictus	4.79167685	52.29166805
Aedes albopictus	5.20834355	52.12500137
Aedes albopictus	4.29167681	51.95833469
Aedes albopictus	5.54167691	51.79166801
Aedes albopictus	5.54167691	51.70833467
Aedes albopictus	4.87501019	51.62500133
Aedes albopictus	4.54167683	51.54166799
Aedes albopictus	4.12501013	51.20833463
Aedes albopictus	4.20834347	51.20833463
Aedes albopictus	5.70834359	51.20833463
Aedes albopictus	5.87501027	51.20833463
Aedes albopictus	-0.37499023	49.12500113
Aedes albopictus	8.54167715	49.12500113
Aedes albopictus	2.12500997	49.04166779
Aedes albopictus	16.62501113	49.12500113
Aedes albopictus	-0.70832359	48.79166777
Aedes albopictus	16.62501113	48.79166777
Aedes albopictus	16.87501115	48.79166777
Aedes albopictus	16.95834449	48.70833443
Aedes albopictus	21.29167817	48.70833443
Aedes albopictus	2.95834337	48.62500109
Aedes albopictus	0.04167647	48.54166775
Aedes albopictus	7.95834377	48.54166775
Aedes albopictus	7.87501043	48.45833441
Aedes albopictus	7.79167709	48.29166773
Aedes albopictus	7.70834375	47.95833437
Aedes albopictus	7.79167709	47.95833437
Aedes albopictus	7.87501043	47.95833437
Aedes albopictus	11.95834409	47.87500103
Aedes albopictus	7.54167707	47.79166769
Aedes albopictus	7.79167709	47.70833435
Aedes albopictus	7.62501041	47.62500101
Aedes albopictus	16.29167777	47.12500097
Aedes albopictus	0.45834317	46.79166761
Aedes albopictus	5.70834359	46.79166761
Aedes albopictus	0.54167651	46.62500093
Aedes albopictus	4.54167683	46.62500093
Aedes albopictus	8.79167717	46.29166757
Aedes albopictus	9.95834393	46.29166757
Aedes albopictus	12.20834411	46.29166757
Aedes albopictus	8.79167717	46.20833423
Aedes albopictus	12.87501083	46.20833423
Aedes albopictus	8.29167713	46.12500089
Aedes albopictus	11.20834403	46.12500089
Aedes albopictus	12.62501081	46.12500089
Aedes albopictus	13.12501085	46.12500089
Aedes albopictus	13.79167757	46.12500089
Aedes albopictus	5.45834357	46.04166755
Aedes albopictus	6.45834365	46.04166755
Aedes albopictus	11.12501069	46.04166755
Aedes albopictus	13.20834419	46.04166755
Aedes albopictus	14.62501097	46.04166755
Aedes albopictus	9.20834387	45.95833421
Aedes albopictus	10.87501067	45.95833421
Aedes albopictus	4.70834351	45.87500087
Aedes albopictus	5.20834355	45.87500087
Aedes albopictus	8.79167717	45.87500087
Aedes albopictus	9.04167719	45.87500087
Aedes albopictus	9.37501055	45.87500087
Aedes albopictus	10.87501067	45.87500087
Aedes albopictus	12.20834411	45.87500087
Aedes albopictus	13.45834421	45.87500087
Aedes albopictus	8.79167717	45.79166753
Aedes albopictus	9.87501059	45.79166753
Aedes albopictus	10.37501063	45.79166753
Aedes albopictus	12.04167743	45.79166753
Aedes albopictus	12.20834411	45.79166753
Aedes albopictus	12.45834413	45.79166753
Aedes albopictus	12.79167749	45.79166753
Aedes albopictus	12.87501083	45.79166753
Aedes albopictus	15.95834441	45.79166753
Aedes albopictus	16.04167775	45.79166753
Aedes albopictus	4.79167685	45.70833419
Aedes albopictus	8.45834381	45.70833419
Aedes albopictus	11.45834405	45.70833419
Aedes albopictus	11.54167739	45.70833419
Aedes albopictus	11.62501073	45.70833419
Aedes albopictus	12.20834411	45.70833419
Aedes albopictus	13.70834423	45.70833419
Aedes albopictus	14.29167761	45.70833419
Aedes albopictus	15.87501107	45.79166753
Aedes albopictus	11.45834405	45.62500085
Aedes albopictus	11.87501075	45.62500085
Aedes albopictus	13.95834425	45.62500085
Aedes albopictus	6.20834363	45.54166751
Aedes albopictus	8.12501045	45.54166751
Aedes albopictus	8.37501047	45.54166751
Aedes albopictus	8.54167715	45.54166751
Aedes albopictus	10.20834395	45.54166751
Aedes albopictus	10.29167729	45.54166751
Aedes albopictus	11.54167739	45.54166751
Aedes albopictus	12.54167747	45.54166751
Aedes albopictus	6.37501031	45.45833417
Aedes albopictus	6.45834365	45.45833417
Aedes albopictus	9.12501053	45.45833417
Aedes albopictus	9.20834387	45.45833417
Aedes albopictus	10.45834397	45.45833417
Aedes albopictus	10.54167731	45.45833417
Aedes albopictus	11.04167735	45.45833417
Aedes albopictus	11.79167741	45.37500083
Aedes albopictus	11.87501075	45.37500083
Aedes albopictus	5.54167691	45.29166749
Aedes albopictus	9.54167723	45.29166749
Aedes albopictus	9.62501057	45.29166749
Aedes albopictus	11.87501075	45.29166749
Aedes albopictus	10.04167727	45.20833415
Aedes albopictus	10.79167733	45.20833415
Aedes albopictus	10.87501067	45.20833415
Aedes albopictus	7.37501039	45.12500081
Aedes albopictus	10.04167727	45.12500081
Aedes albopictus	10.79167733	45.12500081
Aedes albopictus	13.62501089	45.12500081
Aedes albopictus	13.87501091	45.12500081
Aedes albopictus	39.20834627	45.12500081
Aedes albopictus	7.70834375	45.04166747
Aedes albopictus	9.04167719	45.04166747
Aedes albopictus	11.79167741	45.04166747
Aedes albopictus	14.70834431	45.04166747
Aedes albopictus	11.87501075	45.04166747
Aedes albopictus	11.87501075	44.95833413
Aedes albopictus	19.70834471	44.95833413
Aedes albopictus	-0.45832357	44.87500079
Aedes albopictus	8.62501049	44.87500079
Aedes albopictus	9.62501057	44.87500079
Aedes albopictus	4.37501015	44.79166745
Aedes albopictus	8.20834379	44.79166745
Aedes albopictus	5.20834355	44.70833411
Aedes albopictus	9.95834393	44.70833411
Aedes albopictus	11.79167741	44.79166745
Aedes albopictus	16.95834449	44.70833411
Aedes albopictus	10.54167731	44.62500077
Aedes albopictus	10.95834401	44.62500077
Aedes albopictus	11.20834403	44.62500077
Aedes albopictus	10.87501067	44.54166743
Aedes albopictus	10.95834401	44.54166743
Aedes albopictus	11.29167737	44.54166743
Aedes albopictus	11.37501071	44.54166743
Aedes albopictus	7.54167707	44.45833409
Aedes albopictus	8.95834385	44.45833409
Aedes albopictus	9.04167719	44.45833409
Aedes albopictus	11.04167735	44.45833409
Aedes albopictus	11.29167737	44.45833409
Aedes albopictus	11.37501071	44.45833409
Aedes albopictus	11.45834405	44.45833409
Aedes albopictus	26.12501189	44.45833409
Aedes albopictus	0.45834317	44.37500075
Aedes albopictus	8.95834385	44.37500075
Aedes albopictus	9.04167719	44.37500075
Aedes albopictus	9.12501053	44.37500075
Aedes albopictus	11.95834409	44.37500075
Aedes albopictus	12.20834411	44.45833409
Aedes albopictus	12.20834411	44.37500075
Aedes albopictus	2.62501001	44.29166741
Aedes albopictus	8.45834381	44.29166741
Aedes albopictus	12.20834411	44.29166741
Aedes albopictus	12.29167745	44.29166741
Aedes albopictus	8.29167713	44.20833407
Aedes albopictus	9.79167725	44.20833407
Aedes albopictus	9.95834393	44.20833407
Aedes albopictus	12.04167743	44.20833407
Aedes albopictus	15.37501103	44.20833407
Aedes albopictus	6.20834363	44.12500073
Aedes albopictus	12.12501077	44.12500073
Aedes albopictus	12.20834411	44.12500073
Aedes albopictus	12.37501079	44.12500073
Aedes albopictus	5.20834355	44.04166739
Aedes albopictus	10.45834397	44.04166739
Aedes albopictus	12.04167743	44.04166739
Aedes albopictus	4.04167679	43.95833405
Aedes albopictus	7.20834371	43.95833405
Aedes albopictus	7.79167709	43.95833405
Aedes albopictus	10.87501067	43.95833405
Aedes albopictus	11.12501069	43.95833405
Aedes albopictus	12.54167747	43.95833405
Aedes albopictus	10.45834397	43.87500071
Aedes albopictus	11.12501069	43.87500071
Aedes albopictus	11.20834403	43.87500071
Aedes albopictus	15.87501107	43.87500071
Aedes albopictus	7.45834373	43.79166737
Aedes albopictus	11.20834403	43.79166737
Aedes albopictus	11.29167737	43.79166737
Aedes albopictus	7.04167703	43.70833403
Aedes albopictus	7.20834371	43.70833403
Aedes albopictus	10.62501065	43.70833403
Aedes albopictus	10.79167733	43.70833403
Aedes albopictus	11.12501069	43.70833403
Aedes albopictus	12.62501081	43.70833403
Aedes albopictus	3.37501007	43.62500069
Aedes albopictus	10.37501063	43.70833403
Aedes albopictus	5.04167687	43.54166735
Aedes albopictus	10.29167729	43.54166735
Aedes albopictus	11.87501075	43.54166735
Aedes albopictus	10.62501065	43.45833401
Aedes albopictus	13.20834419	43.45833401
Aedes albopictus	6.29167697	43.37500067
Aedes albopictus	1.20834323	43.29166733
Aedes albopictus	10.54167731	43.29166733
Aedes albopictus	-0.87499027	43.20833399
Aedes albopictus	11.45834405	43.20833399
Aedes albopictus	12.37501079	43.12500065
Aedes albopictus	12.62501081	43.12500065
Aedes albopictus	13.29167753	43.12500065
Aedes albopictus	2.45834333	43.04166731
Aedes albopictus	13.54167755	42.95833397
Aedes albopictus	11.12501069	42.79166729
Aedes albopictus	9.37501055	42.70833395
Aedes albopictus	11.29167737	42.70833395
Aedes albopictus	19.37501135	42.70833395
Aedes albopictus	2.45834333	42.62500061
Aedes albopictus	12.37501079	42.62500061
Aedes albopictus	13.70834423	42.62500061
Aedes albopictus	13.95834425	42.62500061
Aedes albopictus	9.37501055	42.54166727
Aedes albopictus	9.45834389	42.54166727
Aedes albopictus	9.04167719	42.45833393
Aedes albopictus	11.95834409	42.45833393
Aedes albopictus	12.04167743	42.45833393
Aedes albopictus	27.29167865	42.45833393
Aedes albopictus	12.95834417	42.37500059
Aedes albopictus	14.04167759	42.29166725
Aedes albopictus	19.79167805	42.20833391
Aedes albopictus	20.37501143	42.20833391
Aedes albopictus	11.79167741	42.12500057
Aedes albopictus	13.62501089	42.12500057
Aedes albopictus	14.45834429	42.12500057
Aedes albopictus	2.54167667	42.04166723
Aedes albopictus	9.45834389	42.04166723
Aedes albopictus	11.87501075	42.04166723
Aedes albopictus	11.95834409	42.04166723
Aedes albopictus	12.70834415	42.04166723
Aedes albopictus	19.54167803	42.04166723
Aedes albopictus	12.04167743	41.95833389
Aedes albopictus	12.12501077	41.95833389
Aedes albopictus	12.45834413	41.95833389
Aedes albopictus	12.87501083	41.95833389
Aedes albopictus	8.95834385	41.87500055
Aedes albopictus	12.20834411	41.87500055
Aedes albopictus	12.45834413	41.87500055
Aedes albopictus	12.54167747	41.87500055
Aedes albopictus	12.79167749	41.87500055
Aedes albopictus	2.04167663	41.79166721
Aedes albopictus	12.20834411	41.79166721
Aedes albopictus	12.29167745	41.79166721
Aedes albopictus	12.37501079	41.79166721
Aedes albopictus	19.87501139	41.79166721
Aedes albopictus	12.70834415	41.70833387
Aedes albopictus	14.79167765	41.70833387
Aedes albopictus	19.70834471	41.70833387
Aedes albopictus	12.54167747	41.62500053
Aedes albopictus	13.37501087	41.62500053
Aedes albopictus	13.54167755	41.62500053
Aedes albopictus	15.54167771	41.62500053
Aedes albopictus	19.70834471	41.62500053
Aedes albopictus	20.20834475	41.62500053
Aedes albopictus	13.29167753	41.54166719
Aedes albopictus	19.79167805	41.54166719
Aedes albopictus	-2.04165703	41.45833385
Aedes albopictus	2.04167663	41.45833385
Aedes albopictus	2.12500997	41.45833385
Aedes albopictus	12.87501083	41.45833385
Aedes albopictus	13.20834419	41.45833385
Aedes albopictus	13.70834423	41.45833385
Aedes albopictus	15.54167771	41.45833385
Aedes albopictus	19.54167803	41.45833385
Aedes albopictus	13.04167751	41.29166717
Aedes albopictus	19.79167805	41.29166717
Aedes albopictus	24.20834507	41.29166717
Aedes albopictus	26.54167859	41.29166717
Aedes albopictus	14.12501093	41.20833383
Aedes albopictus	19.87501139	41.20833383
Aedes albopictus	24.87501179	41.12500049
Aedes albopictus	0.87500987	41.04166715
Aedes albopictus	14.29167761	41.04166715
Aedes albopictus	16.62501113	41.04166715
Aedes albopictus	20.12501141	41.04166715
Aedes albopictus	22.70834495	41.04166715
Aedes albopictus	23.45834501	41.04166715
Aedes albopictus	9.45834389	40.95833381
Aedes albopictus	19.79167805	40.95833381
Aedes albopictus	26.29167857	40.95833381
Aedes albopictus	14.29167761	40.87500047
Aedes albopictus	20.70834479	40.87500047
Aedes albopictus	22.20834491	40.87500047
Aedes albopictus	26.62501193	40.87500047
Aedes albopictus	-0.54165691	40.79166713
Aedes albopictus	8.95834385	40.79166713
Aedes albopictus	14.45834429	40.79166713
Aedes albopictus	19.62501137	40.70833379
Aedes albopictus	23.12501165	40.70833379
Aedes albopictus	17.70834455	40.62500045
Aedes albopictus	20.12501141	40.62500045
Aedes albopictus	20.79167813	40.62500045
Aedes albopictus	15.87501107	40.54166711
Aedes albopictus	17.20834451	40.54166711
Aedes albopictus	15.12501101	40.45833377
Aedes albopictus	16.37501111	40.45833377
Aedes albopictus	23.70834503	40.29166709
Aedes albopictus	-0.20832355	40.20833375
Aedes albopictus	22.37501159	40.20833375
Aedes albopictus	9.20834387	40.12500041
Aedes albopictus	18.12501125	40.12500041
Aedes albopictus	19.79167805	40.12500041
Aedes albopictus	20.20834475	40.12500041
Aedes albopictus	8.70834383	40.04166707
Aedes albopictus	2.87501003	39.62500037
Aedes albopictus	16.37501111	39.62500037
Aedes albopictus	19.87501139	39.62500037
Aedes albopictus	20.37501143	39.54166703
Aedes albopictus	-0.79165693	39.45833369
Aedes albopictus	8.95834385	39.37500035
Aedes albopictus	9.04167719	39.29166701
Aedes albopictus	16.29167777	39.29166701
Aedes albopictus	9.12501053	39.20833367
Aedes albopictus	16.87501115	39.20833367
Aedes albopictus	8.79167717	38.95833365
Aedes albopictus	16.54167779	38.79166697
Aedes albopictus	21.37501151	38.70833363
Aedes albopictus	16.12501109	38.62500029
Aedes albopictus	-0.45832357	38.37500027
Aedes albopictus	16.12501109	38.20833359
Aedes albopictus	-1.54165699	38.04166691
Aedes albopictus	14.95834433	38.04166691
Aedes albopictus	21.87501155	38.04166691
Aedes albopictus	23.70834503	38.04166691
Aedes albopictus	22.70834495	37.95833357
Aedes albopictus	13.62501089	37.87500023
Aedes albopictus	20.79167813	37.79166689
Aedes albopictus	21.54167819	37.70833355
Aedes albopictus	14.45834429	37.62500021
Aedes albopictus	14.79167765	37.54166687
Aedes albopictus	22.37501159	37.45833353
Aedes albopictus	21.95834489	37.12500017
Aedes albopictus	15.04167767	37.04166683
Aedes albopictus	14.70834431	36.95833349
Aedes albopictus	4.20834347	36.62500013
Aedes albopictus	14.45834429	35.87500007
